# Supplementary material for: Metal–organic gel templated synthesis of magnetic porous carbon for highly efficient removal of organic dyes
Source: Royal Society of Chemistry journal article supplement (doi:10.1039/c5dt04260g), 2016-01-01
Supplement: c5dt04260g1.pdf [file c5dt04260g1.pdf]

## Supplementary information

### Metal-organic gel templated synthesis of magnetic porous carbon for highly efficient removal of organic dyes

Luhuan Wang,<sup>a</sup> Fei Ke,<sup>b</sup> Junfa Zhu<sup>a,\*</sup>

<sup>a</sup> National Synchrotron Radiation Laboratory and Collaborative Innovation Center of Suzhou Nano Science and Technology, University of Science and Technology of China, Hefei 230029, P.R. China. E-mail: jfzhu@ustc.edu.cn; Fax: +86-551-5141078

<sup>b</sup> Department of Applied Chemistry, Anhui Agricultural University, Hefei 230036, P.R. China.

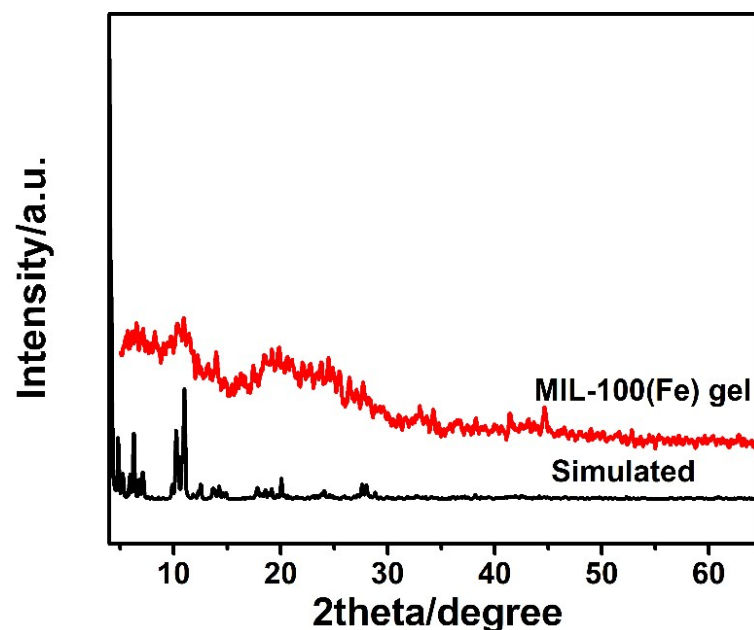

**Fig. S1** PXR patterns of the as-synthesized MIL-100(Fe) gel by hydrothermal method and the XRD pattern simulated from crystal structure data of MIL-100(Fe).

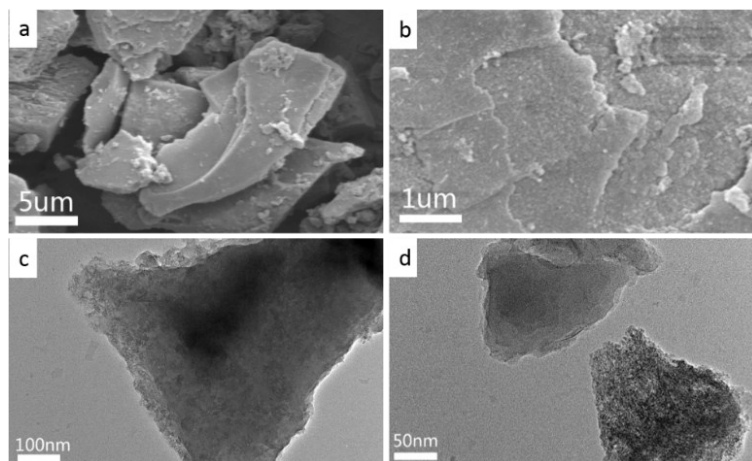

**Fig. S2** (a,b) SEM ,(c,d) of TEM images of MIL-100(Fe) gel.

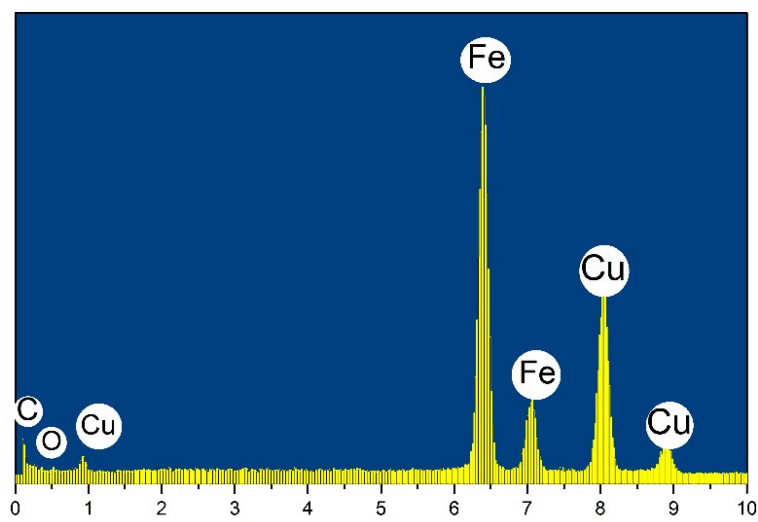

**Fig. S3** EDX spectra of magnetic porous carbon.

**Table S1** Elemental analysis of the magnetic porous carbon.

| Element        | Fe    | C     | H    | N    | O    |
|----------------|-------|-------|------|------|------|
| Content (wt %) | 52.54 | 42.13 | 0.44 | 0.24 | 4.65 |

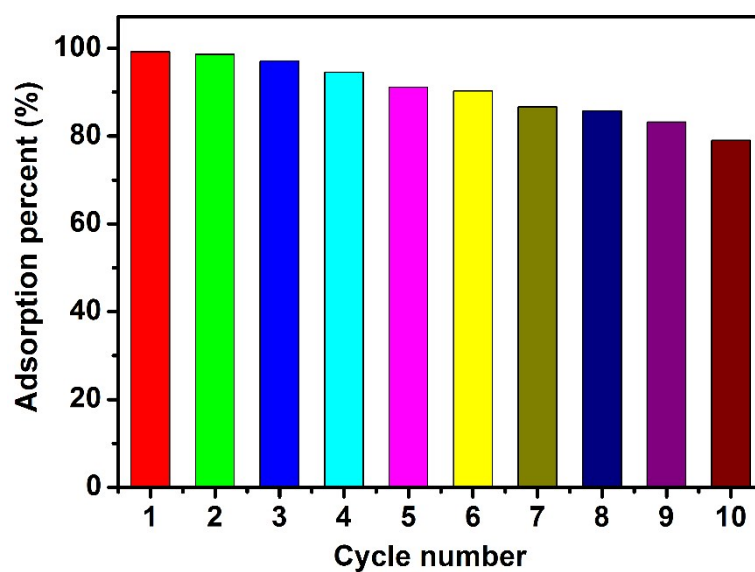

**Fig. S4** Recyclability experiments for 10 cycles of the original and regenerated adsorbent magnetic porous carbon for the adsorption of MO (25ppm).

**Table S2** Summary of adsorption capacity of magnetic porous carbons reported previously and investigated in the present work for adsorption of several organic dyes.

| Sample                                                                                                                                    | Dyes          | Adsorption capacity (mg g <sup>-1</sup> ) | References |
|-------------------------------------------------------------------------------------------------------------------------------------------|---------------|-------------------------------------------|------------|
| Magnetic hierarchical porous carbon Fe <sub>3</sub> O <sub>4</sub> /C                                                                     | Methyl orange | 152                                       | 39         |
| Magnetic beads containing magnetic nanoparticles and activated carbon                                                                     | Methyl orange | 0.65                                      | 40         |
| Magnetic multi-walled carbon nanotubes                                                                                                    | Methyl orange | 81                                        | 41         |
| Chitosan wrapping magnetic nanosized α-Fe <sub>2</sub> O <sub>3</sub> and multi-walled carbon nanotubes                                   | Methyl orange | 66                                        | 42         |
| Magnetic alginate beads crosslinked with epichlorohydrin                                                                                  | Methyl orange | 6.5                                       | 43         |
| Cobalt nanosized particles                                                                                                                | Methyl orange | 170                                       | 44         |
| Magnetic Ni-containing ordered mesoporous carbons (Ni/OMCs)                                                                               | Methyl orange | 107                                       | 45         |
| Magnetic α-Fe <sub>2</sub> O <sub>3</sub> /crosslinked chitosan composites                                                                | Methyl orange | 29.5                                      | 46         |
| Activated carbon/ Fe <sub>3</sub> O <sub>4</sub> (modified by HNO <sub>3</sub> )nanoparticle composites                                   | Methyl orange | 182-242                                   | 47         |
| Magnetic CoFe <sub>2</sub> O <sub>4</sub> -functionalized graphenesheets(CoFe <sub>2</sub> O <sub>4</sub> -FGS)                           | Methyl orange | 71                                        | 48         |
| α-Fe <sub>2</sub> O <sub>3</sub> /SiO <sub>2</sub> /chitosan composite                                                                    | Methyl orange | 34.3                                      | 49         |
| Magnetic cellulose beads entrapping activated carbon γ-Fe <sub>2</sub> O <sub>3</sub> /C                                                  | Methyl orange | 2.1                                       | 50         |
| Metal-organic gel derived magnetic particles embedded porous carbon (γ-Fe <sub>2</sub> O <sub>3</sub> /Fe <sub>3</sub> C/α-Fe/C)materials | Methyl orange | 182.8                                     | This work  |
